# Supplementary material for: Relativistic Prolapse-Free Gaussian Basis Sets of Double- and Triple-ζ Quality for s- and p-Block Elements: (aug-)RPF-2Z and (aug-)RPF-3Z
Source: PubMed Central journal article supplement (PMC11603607; doi:10.1021/acs.jctc.4c01211), 2024-11-14
Supplement: ct4c01211_si_001.pdf [file ct4c01211_si_001.pdf]

# Relativistic Prolapse-Free Gaussian Basis Sets of Double- and Triple- $\zeta$ Quality for s- and p-Block Elements: (aug-)RPF-2Z and (aug-)RPF-3Z

Julielson dos Santos Sousa,<sup>\*</sup> Eriosvaldo Florentino Gusmão,<sup>\*</sup> Anne Kéllen de  
Nazaré dos Reis Dias,<sup>\*</sup> and Roberto Luiz Andrade Haiduke<sup>\*</sup>

*Department of Chemistry and Molecular Physics, São Carlos Institute of Chemistry,  
University of São Paulo, C.P. 780, 13560-970, São Carlos, SP, Brazil.*

E-mail: julielson@usp.br; eriosvaldo.gusmao@alumni.usp.br; annekellenreis@usp.br;  
haiduke@iqsc.usp.br

**Supporting Information**

Table S1: Equilibrium bond lengths ( $\text{\AA}$ ) obtained at the DC-CCSD-T level.<sup>a</sup>

| Molecule                          | RPF-2Z        | RPF-3Z        | dyall.v2z     | dyall.v3z     | Exp. <sup>b</sup> |
|-----------------------------------|---------------|---------------|---------------|---------------|-------------------|
| <sup>1</sup> LiH                  | 1.5872        | 1.5932        | 1.5925        | 1.5964        | 1.5957            |
| <sup>23</sup> NaH                 | 1.9068        | 1.8841        | 1.8826        | 1.8860        | 1.8874            |
| <sup>39</sup> KH                  | 2.2705        | 2.2568        | 2.2661        | 2.2523        | 2.2425            |
| <sup>85</sup> RbH                 | 2.3942        | 2.3716        | 2.3891        | 2.3702        | 2.367             |
| <sup>133</sup> CsH                | 2.5013        | 2.4909        | 2.5455        | 2.5082        | 2.4938            |
| H <sup>19</sup> F                 | 0.9151        | 0.9166        | 0.9209        | 0.9187        | 0.916808          |
| H <sup>35</sup> Cl                | 1.2846        | 1.2776        | 1.2885        | 1.2783        | 1.274552          |
| H <sup>81</sup> Br                | 1.4106        | 1.4127        | 1.4197        | 1.4141        | 1.414435          |
| H <sup>127</sup> I                | 1.6088        | 1.6051        | 1.6150        | 1.6121        | 1.60916           |
| <sup>11</sup> B <sup>19</sup> F   | 1.2834        | 1.2745        | 1.2797        | 1.2710        | 1.26259           |
| <sup>27</sup> Al <sup>19</sup> F  | 1.7085        | 1.6702        | 1.7143        | 1.6761        | 1.654369          |
| <sup>69</sup> Ga <sup>19</sup> F  | 1.7995        | 1.7816        | 1.7990        | 1.7848        | 1.774369          |
| <sup>115</sup> In <sup>19</sup> F | 2.0284        | 2.0039        | 2.0225        | 2.0046        | 1.985396          |
| <sup>205</sup> Tl <sup>19</sup> F | 2.1205        | 2.0968        | 2.1128        | 2.0948        | 2.084438          |
| <b>MAD<sup>c</sup></b>            | <b>0.0204</b> | <b>0.0073</b> | <b>0.0216</b> | <b>0.0078</b> |                   |
| <b>MAE<sup>d</sup></b>            | <b>0.0541</b> | <b>0.0185</b> | <b>0.0600</b> | <b>0.0217</b> |                   |

<sup>a</sup> Bond length results are determined through a fourth order polynomial adjustment given by five energy values around the minimum in the potential energy curve (see the main text);

<sup>b</sup> These values are taken from the NIST Standard Reference Data [Klaus P. Huber and Gerhard H. Herzberg (data prepared by Jean W. Gallagher and Russell D. Johnson, III) "Constants of Diatomic Molecules" in NIST Chemistry WebBook, NIST Standard Reference Database Number 69, Eds. P.J. Linstrom and W.G. Mallard, National Institute of Standards and Technology, Gaithersburg MD, 20899, <https://doi.org/10.18434/T4D303> (accessed Jul 17, 2024)];

<sup>c</sup> Mean absolute deviation with respect to the experimental values;

<sup>d</sup> Maximum absolute error with respect to the experimental values.

Table S2: Harmonic vibrational frequencies ( $\text{cm}^{-1}$ ) obtained at the DC-CCSD-T level.<sup>a</sup>

| Molecule                          | RPF-2Z    | RPF-3Z    | dyall.v2z | dyall.v3z | Exp. <sup>b</sup> |
|-----------------------------------|-----------|-----------|-----------|-----------|-------------------|
| <sup>1</sup> LiH                  | 1431      | 1421      | 1419      | 1409      | 1405.65           |
| <sup>23</sup> NaH                 | 1149      | 1183      | 1185      | 1183      | 1172.2            |
| <sup>39</sup> KH                  | 974       | 974       | 986       | 991       | 983.6             |
| <sup>85</sup> RbH                 | 915       | 949       | 928       | 944       | 936.94            |
| <sup>133</sup> CsH                | 900       | 896       | 861       | 893       | 891.0             |
| H <sup>19</sup> F                 | 4190      | 4180      | 4095      | 4163      | 4138.32           |
| H <sup>35</sup> Cl                | 3009      | 3002      | 3001      | 3010      | 2990.9463         |
| H <sup>81</sup> Br                | 2680      | 2685      | 2680      | 2674      | 2648.975          |
| H <sup>127</sup> I                | 2298      | 2316      | 2330      | 2321      | 2309.014          |
| <sup>11</sup> B <sup>19</sup> F   | 1306      | 1385      | 1336      | 1393      | 1402.13           |
| <sup>27</sup> Al <sup>19</sup> F  | 737       | 803       | 720       | 793       | 802.26            |
| <sup>69</sup> Ga <sup>19</sup> F  | 595       | 627       | 605       | 620       | 622.2             |
| <sup>115</sup> In <sup>19</sup> F | 505       | 523       | 521       | 533       | 533.35            |
| <sup>205</sup> Tl <sup>19</sup> F | 450       | 470       | 468       | 469       | 477.3             |
| <b>MAD<sup>c</sup></b>            | <b>32</b> | <b>13</b> | <b>26</b> | <b>10</b> |                   |
| <b>MAE<sup>d</sup></b>            | <b>97</b> | <b>42</b> | <b>82</b> | <b>25</b> |                   |

<sup>a</sup> Harmonic vibrational frequency results are determined through a fourth order polynomial adjustment given by five energy values around the minimum in the potential energy curve (see the main text);

<sup>b</sup> These values are taken from the NIST Standard Reference Data [Klaus P. Huber and Gerhard H. Herzberg (data prepared by Jean W. Gallagher and Russell D. Johnson, III) "Constants of Diatomic Molecules" in NIST Chemistry WebBook, NIST Standard Reference Database Number 69, Eds. P.J. Linstrom and W.G. Mallard, National Institute of Standards and Technology, Gaithersburg MD, 20899, <https://doi.org/10.18434/T4D303> (accessed Jul 17, 2024)];

<sup>c</sup> Mean absolute deviation with respect to the experimental values;

<sup>d</sup> Maximum absolute error with respect to the experimental values.

Table S3: Molecular dipole moments (D) obtained at the DC-CCSD-T level.<sup>a</sup>

| Molecule                          | RPF-2Z      | RPF-3Z      | dyall.v2z   | dyall.v3z   | Exp. <sup>b</sup> |
|-----------------------------------|-------------|-------------|-------------|-------------|-------------------|
| <sup>1</sup> LiH                  | 5.72        | 5.79        | 5.78        | 5.83        | 5.884             |
| <sup>23</sup> NaH                 | 6.38        | 6.35        | 6.23        | 6.36        |                   |
| <sup>39</sup> KH                  | 7.85        | 8.00        | 7.92        | 8.01        |                   |
| <sup>85</sup> RbH                 | 7.93        | 8.04        | 8.11        | 8.19        |                   |
| <sup>133</sup> CsH                | 8.03        | 8.17        | 8.28        | 8.33        |                   |
| H <sup>19</sup> F                 | 1.95        | 1.88        | 1.85        | 1.80        | 1.826178          |
| H <sup>35</sup> Cl                | 1.32        | 1.23        | 1.19        | 1.12        | 1.1086            |
| H <sup>81</sup> Br                | 0.91        | 0.86        | 0.88        | 0.84        | 0.8272            |
| H <sup>127</sup> I                | 0.50        | 0.47        | 0.51        | 0.46        | 0.448             |
| <sup>11</sup> B <sup>19</sup> F   | 0.79        | 0.86        | 0.85        | 0.87        | 0.5               |
| <sup>27</sup> Al <sup>19</sup> F  | 1.59        | 1.43        | 1.53        | 1.40        | 1.53              |
| <sup>69</sup> Ga <sup>19</sup> F  | 2.41        | 2.35        | 2.32        | 2.31        | 2.45              |
| <sup>115</sup> In <sup>19</sup> F | 3.30        | 3.18        | 3.19        | 3.20        | 3.40              |
| <sup>205</sup> Tl <sup>19</sup> F | 4.29        | 4.22        | 4.15        | 4.19        | 4.2282            |
| <b>MAD<sup>c</sup></b>            | <b>0.10</b> | <b>0.08</b> | <b>0.12</b> | <b>0.07</b> |                   |
| <b>MAE<sup>d</sup></b>            | <b>0.21</b> | <b>0.22</b> | <b>0.35</b> | <b>0.20</b> |                   |

<sup>a</sup> These results were obtained at the experimental equilibrium ground state geometry [Klaus P. Huber and Gerhard H. Herzberg (data prepared by Jean W. Gallagher and Russell D. Johnson, III) "Constants of Diatomic Molecules" in NIST Chemistry Web-Book, NIST Standard Reference Database Number 69, Eds. P.J. Linstrom and W.G. Mallard, National Institute of Standards and Technology: Gaithersburg MD, 20899, <https://doi.org/10.18434/T4D303> (accessed Jul 17, 2024)] by the sum of the analytic DFC value with DC-CCSD-T electron correlation contributions given by the finite-difference technique in a two point approach (see the main text);

<sup>b</sup> These values are taken from the CRC Handbook of Chemistry and Physics [CRC Handbook of Chemistry and Physics, 94th ed.; Internet Version 2014; Ed. W. M. Haynes, CRC Press/Taylor and Francis: Boca Raton, FL, 2014; Available online: <http://www.hbcpnetbase.com/> (accessed May 15, 2014).];

<sup>c</sup> Mean absolute deviation with respect to the experimental values;

<sup>d</sup> Maximum absolute error with respect to the experimental values.

Table S4: Electron affinities (eV) obtained at the FS-CCSD level.

| Atom                   | aug-RPF-2Z  | aug-RPF-3Z  | dyall.av2z  | dyall.av3z  | Exp. <sup>a</sup> |
|------------------------|-------------|-------------|-------------|-------------|-------------------|
| F                      | 3.1528      | 3.2851      | 3.1857      | 3.3040      | 3.4011897         |
| Cl                     | 3.4435      | 3.5549      | 3.4664      | 3.5524      | 3.612725          |
| Br                     | 3.2095      | 3.2890      | 3.2159      | 3.2907      | 3.3635882         |
| I                      | 2.8817      | 2.9359      | 2.8809      | 2.9615      | 3.0590368         |
| B                      | 0.0880      | 0.1336      | 0.1074      | 0.1338      | 0.279723          |
| Al                     | 0.3443      | 0.3782      | 0.3397      | 0.3753      | 0.43283           |
| Ga                     | 0.2387      | 0.2796      | 0.2328      | 0.2718      | 0.43              |
| In                     | 0.3238      | 0.3648      | 0.3204      | 0.3685      | 0.3               |
| Tl                     | 0.2427      | 0.2657      | 0.2005      | 0.2627      | 0.377             |
| <b>MAD<sup>b</sup></b> | <b>0.15</b> | <b>0.10</b> | <b>0.15</b> | <b>0.10</b> |                   |
| <b>MAE<sup>c</sup></b> | <b>0.25</b> | <b>0.15</b> | <b>0.22</b> | <b>0.16</b> |                   |

<sup>a</sup> These values are taken from the CRC Handbook of Chemistry and Physics [CRC Handbook of Chemistry and Physics, 94th ed.; Internet Version 2014; Ed. W. M. Haynes, CRC Press/Taylor and Francis: Boca Raton, FL, 2014; Available online: <http://www.hbcnetbase.com/> (accessed May 15, 2014).];

<sup>b</sup> Mean absolute deviation with respect to the experimental values;

<sup>c</sup> Maximum absolute error with respect to the experimental values.
